# Supplementary material for: A single cell characterisation of human embryogenesis identifies pluripotency transitions and putative anterior hypoblast centre
Source: Nat Commun. 2021 Jun 17;12:3679. doi: 10.1038/s41467-021-23758-w (PMC8211662; doi:10.1038/s41467-021-23758-w)
Supplement: Supplementary file 4 — Supplementary Data 1 [file 41467_2021_23758_MOESM4_ESM.xlsx]

## Sheet: Sheet1
Supplementary Data 1_sheet1/2
DAY 9 (8 embryos)
ID	ID_2	Age	Seq. platform	Batch	Epiblast	Hypoblast	SCT	CT	Median counts/cell	Median genes/cell	Epi median counts/cell	Epi median genes/cell	Hypo median counts/cell	Hypo median genes/cell	SCT median counts/cell	SCT median genes/cell	CT median counts/cell	CT median genes/cell
5354STDY7646913	Embryo 1	day 9	10X	1	17	3	46	39	51345	4651	114210	8533	72784	7635	17349	2904	24427	4476
5354STDY7646912	Embryo 2	day 9	10X	1	19	15	74	79	70575	6993	70131	7393	64670	7266	12170	2596	84658	7519
5354STDY7758314	Embryo 7	day 9	10X	3	15	19	188	522	29093	4421	42624	5335	31356	5366	11281	2459	44894	5429
5354STDY8788462	Multiplex 1.1	day 9	10X	5	4	12	128	244	16510	3531	10196	3367	5889	2277	16027	3234	23092	4236
5354STDY8788462	Multiplex 1.2	day 9	10X	5	4	8	284	145	13471	3132	50201	7284	28225	5755	13106	3046	14016	3349
5354STDY8788462	Multiplex 1.3	day 9	10X	5	28	9	137	66	20739	3855	69064	7842	61245	7781	13974	2916	80634	7882
5354STDY8788462	Multiplex 1.4	day 9	10X	5	18	8	36	166	84246	7530	68412	8033	31065	4687	9302	2669	94371	7905
5354STDY8795378	Multiplex 3.2	day 9	10X	6	3	8	165	695	7894	2640	75354	8476	5200	2638	11203	2856	6841.5	2541
					108	82	1058	1956
DAY 11 (8 embryos)
ID	ID_2	Age	Seq. platform	Batch	Epiblast	Hypoblast	SCT	CT	Median counts/cell	Median genes/cell	Epi median counts/cell	Epi median genes/cell	Hypo median counts/cell	Hypo median genes/cell	SCT median counts/cell	SCT median genes/cell	CT median counts/cell	CT median genes/cell
5354STDY7752806	Embryo 3	day 11	10X	2	8	13	38	13	48359	6248	56148	6977	87199	8763	186120	3122	64040	6662
5354STDY7752807	Embryo 4	day 11	10X	2	8	4	248	137	26312	3220	48181	6576	17356	3925	13656	2330	57509	6499
5354STDY7954888	Embryo 9	day 11	10X	4	1	4	150	11	7473	1769	27942	4203	34896	5750	6617	1643	17813	3352
5354STDY7954889	Embryo 10	day 11	10X	4	15	15	48	4	35825	5825	63859	8171	60104	7507	31358	4222	16593	2544
5354STDY8788463	Multiplex 2.3	day 11	10X	5	1	5	231	6	8753	2204	5312	1519	180770	10379	8557	2111	19615	2652
5354STDY8795379	Multiplex 4.2	day 11	10X	6	1	4	152	3	5281	1747	27422	6740	46839	49670	5230	1714	103443	8286
5354STDY8795379	Multiplex 4.5	day 11	10X	6	23	2	14	1	21767	3821	49378	6877	49980	5161	7413.5	1926	1882	1085
5354STDY8788463	Multiplex 2.5	day 11	10X	5	1	7	397	51	7254	2124	76289	8093	73894	8105	6830	2040	8379	2639
					58	54	1278	226
				Total 9+11	166	136	2336	2182

## Sheet: Sheet2
Supplementary Data 1_sheet2/2
ID	ID_2	Age	Seq. platform	Batch	Epiblast	Hypoblast	SCT	CT
5354STDY7646913	Embryo 1	day 9	10X	1	17	3	46	39
5354STDY7646912	Embryo 2	day 9	10X	1	19	15	74	79
5354STDY7752806	Embryo 3	day 11	10X	2	8	13	38	13
5354STDY7752807	Embryo 4	day 11	10X	2	8	4	248	137
5354STDY7758312	Embryo 5	day 12	10X	3	0	1	118	47
5354STDY7758313	Embryo 6	day 12	10X	3	0	14	247	73
5354STDY7758314	Embryo 7	day 9	10X	3	15	19	188	522
5354STDY7758315	Embryo 8	day 11	10X	3	0	4	376	53
5354STDY7954888	Embryo 9	day 11	10X	4	1	4	150	11
5354STDY7954889	Embryo 10	day 11	10X	4	15	15	48	4
5354STDY7954890	Embryo 11	day 11	10X	4	2	0	80	20
5354STDY8788462	Multiplex 1.1	day 9	10X	5	4	12	128	244
5354STDY8788462	Multiplex 1.2	day 9	10X	5	4	8	284	145
5354STDY8788462	Multiplex 1.3	day 9	10X	5	28	9	137	66
5354STDY8788462	Multiplex 1.4	day 9	10X	5	18	8	36	166
5354STDY8788462	Multiplex 1.5	day 9	10X	5	2	0	118	10
5354STDY8788463	Multiplex 2.1	day 11	10X	5	0	1	116	13
5354STDY8788463	Multiplex 2.2	day 11	10X	5	0	0	190	11
5354STDY8788463	Multiplex 2.3	day 11	10X	5	1	5	231	6
5354STDY8788463	Multiplex 2.4	day 11	10X	5	0	12	487	9
5354STDY8788463	Multiplex 2.5	day 11	10X	5	1	7	397	51
5354STDY8795378	Multiplex 3.1	day 9	10X	6	5	0	73	19
5354STDY8795378	Multiplex 3.2	day 9	10X	6	3	8	165	695
5354STDY8795378	Multiplex 3.3	day 9	10X	6	0	1	220	165
5354STDY8795379	Multiplex 4.1	day 11	10X	6	0	0	0	2
5354STDY8795379	Multiplex 4.2	day 11	10X	6	1	4	152	3
5354STDY8795379	Multiplex 4.3	day 11	10X	6	0	0	42	2
5354STDY8795379	Multiplex 4.4	day 11	10X	6	0	4	148	5
5354STDY8795379	Multiplex 4.5	day 11	10X	6	23	2	14	1
				Total	166	136	2336	2182	4820
