# Supplementary material for: A single cell characterisation of human embryogenesis identifies pluripotency transitions and putative anterior hypoblast centre
Source: Nat Commun. 2021 Jun 17;12:3679. doi: 10.1038/s41467-021-23758-w (PMC8211662; doi:10.1038/s41467-021-23758-w)
Supplement: Supplementary file 9 — Supplementary Data 6 [file 41467_2021_23758_MOESM9_ESM.xlsx]

## Sheet: Sheet1
Supplementary Data 6
treatment	embryo ID	EPI	HYPO	TROPHO		treatment	embryo ID	EPI	HYPO	TROPHO		treatment	embryo ID	EPI	HYPO	TROPHO		treatment	embryo ID	EPI	HYPO	TROPHO		treatment	embryo ID	EPI	HYPO	TROPHO		treatment	embryo ID	EPI	HYPO	TROPHO
control	MZG 395	1	15			PD (3 uM)	MZG 400	20	9			PD (1 uM)	MZG 422	6	2	141		FGFRi (1uM)	MZG 528	1	0	95		FGFRi (500nM)	MZG 753	2	1	47		FGF2/4/HPS	MZG 772	27	10	459
control	MZG 403	33	29			PD (3 uM)	MZG 401	5	0			PD (1 uM)	MZG 529	8	5	143		FGFRi (1uM)	MZG 423	1	1			FGFRi (500nM)	MZG 750	2	0	43		FGF2/4/HPS	MZG 803	13	0	248
control	MZG355	26	3	105		PD (3 uM)	MZG 402	7	1			PD (1 uM)	MZG456	38	13			FGFRi (1uM)	MZG 571	0	0	94		FGFRi (500nM)	MZG 751	1	0	90		FGF2/4/HPS	MZG 769	15	5	314
control	MZG471	26	8	213		PD (3 uM)	MZG381	8	3	348		PD (1 uM)	MZG 437	0	2	305		FGFRi (1uM)	MZG 453	1	0	72		FGFRi (500nM)	MZG 723	5	0	51		FGF2/4/HPS	MZG 844	17	6	238
control	MZG483	43	6	153		PD (3 uM)	MZG382	10	0			PD (1 uM)	MZG 439	38	17	375		FGFRi (1uM)	MZG 426	4	0	125		FGFRi (500nM)	MZG 600	0	0	21		FGF2/4/HPS	MZG 900	49	3	343
control	MZG485	5	0	33		PD (3 uM)	MZG470	1	0	149		PD (1 uM)	MZG 429	0	0	52		FGFRi (1uM)	MZG567	1	0 or 3			FGFRi (500nM)	MZG 845	2	1	84		FGF2/4/HPS	MZG 850	25	8	320
control	MZG491	41	9	177		PD (3 uM)	MZG482	9	2	128		PD (1 uM)	MZG 561	36	4	105		FGFRi (1uM)	MZG 460	2	0	78		FGFRi (500nM)	MZG 847	8	0	73		FGF2/4/HPS	MZG 848	4	1	376
control	MZG182	10	3	115		PD (3 uM)	MZG496	0	0	267		PD (1 uM)	MZG 468	0	0	309		FGFRi (1uM)	MZG 463	3	3	90		FGFRi (500nM)	MZG 843	8	0	14
control	MZG499	10	9			PD (3 uM)	MZG499	0	2			PD (1 uM)	MZG 452	4	0
control	MZG506			272		PD (3 uM)	MZG501	0	0			PD (1 uM)	MZG 462	4	0	471
control	MZG 530	56	18	184		PD (3 uM)	MZG 457	0	2	348		PD (1uM)	MZG 745	0	0	71
control	MZG 455	154	9	236		PD (3 uM)	MZG 459	1	0	362		PD (1uM)	MZG 755	17	0	72
control	MZG 438	23	5	368								PD (1uM)	MZG 718	4	2	211
control	MZG 428	25	15	313								PD (1uM)	MZG 872	4	1	53
control	MZG 722	13	8	288								PD (1uM)	MZG 926	10	5	327
control	MZG 739	0	0	175
control	MZG 698	28	6	216
control	MZG 836	37	20	459
control	MZG 858	36	16	344
mean		31.5	9.94444	228.188		mean		5.08333	1.58333	267		mean		11.2667	3.4	202.692		mean		1.625	0.571429	92.3333		mean		3.5	0.25	52.875		mean		21.4286	4.71429	328.286
In red = embryos presented in Figure 2c
No of experiments
Exp 1
Exp 2
Exp 3
Exp 4
Exp 4
Exp 6
Exp 7
Exp 8
Exp 9
